# Supplementary material for: Secretion of interleukin-6 by bone marrow mesenchymal stem cells promotes metastasis in hepatocellular carcinoma
Source: PubMed Central journal article supplement (PMC5567045; doi:10.1042/bsr20170181), 2017-07-21
Supplement: bsr-37-bsr20170181-s1.pdf [file bsr-37-bsr20170181-s1.pdf]

## Supplementary Material

### Secretion of interleukin-6 by bone marrow mesenchymal stem cells promotes metastasis in hepatocellular carcinoma

| <b>Table S1</b> Quantification of IL-6 secretion by Bel-7402 |                                               |
|--------------------------------------------------------------|-----------------------------------------------|
| Growth factor                                                | pg/48h/10 <sup>5</sup> cells (mean $\pm$ SEM) |
| IL-6                                                         | 26 $\pm$ 3.68                                 |

**Table S1.** Concentration of Bel-7402-secreted IL-6. The culture medium was collected 48 h after seeding. The quantification of IL-6 was performed by ELISA assay according to the manufacture's instruction. The result was expressed by mean  $\pm$  SEM from at least three independent measurements.

**Fig.S1**

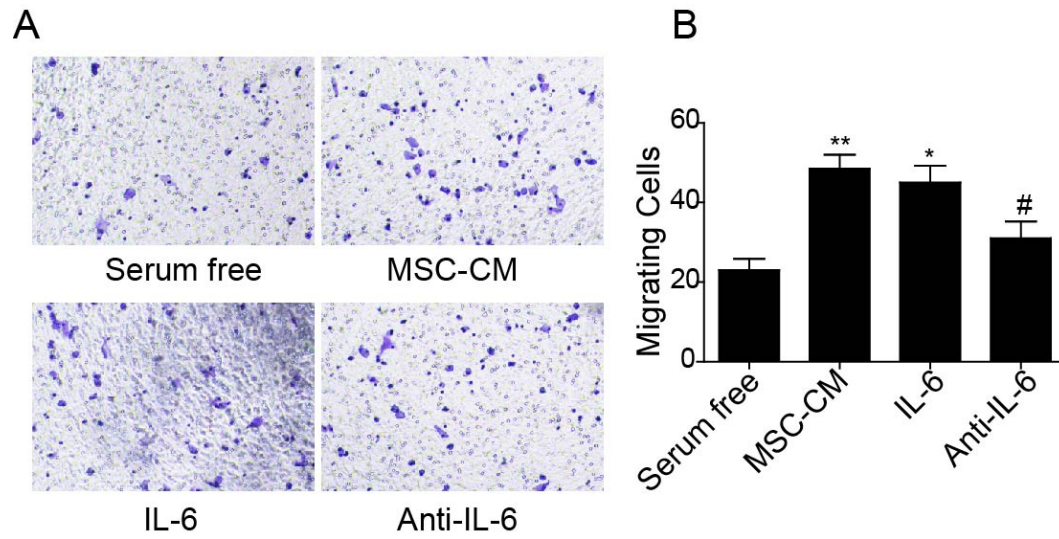

**Figure S1.** Anti-IL-6 antibody reduces Bel-7402 cell invasion. (A) Representative images of invading Bel-7402 cells that treated as indicating. BMSC-CM and recombinant IL-6 promote Bel-7402 cell invasion. Anti-IL-6 antibody significantly reduced cell invasion of BMSC-CM pretreated Bel-7402 cells. (B) The calculated number of invading cells. Data were expressed by mean  $\pm$  SEM from triplicates. #P<0.01, compared to BMSC-CM treated cells; \*P<0.05, \*\*P<0.01, compared to serum free medium treated cells.

**Fig.S2**

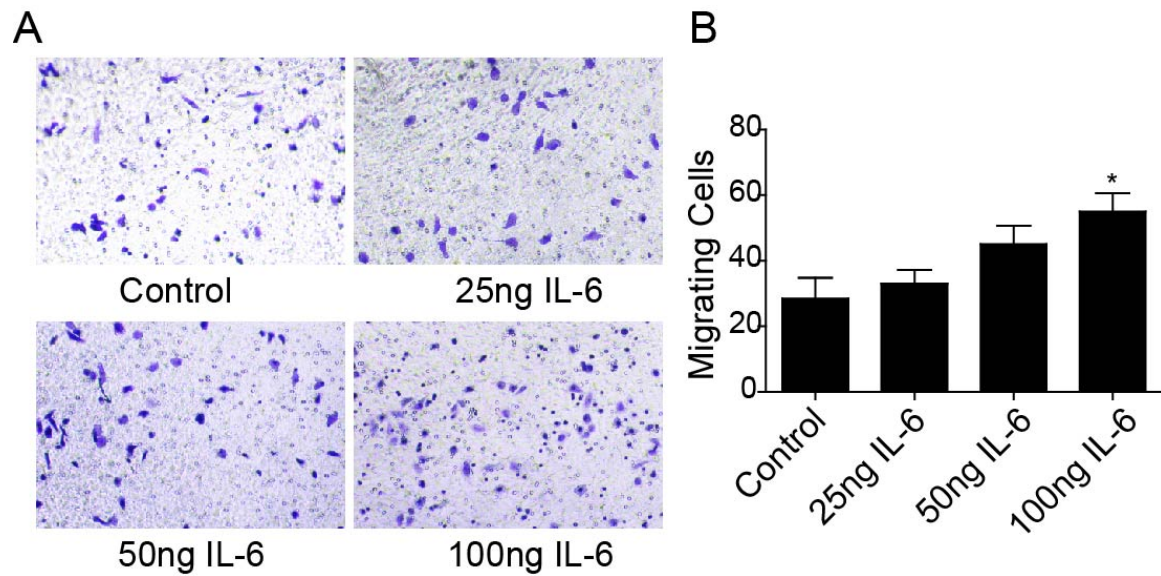

**Figure S2.** Recombinant IL-6 promotes HepG2 cell invasion in a dose-dependent manner. (A) Representative images of invading HepG2 cells that treated by different levels of recombinant IL-6. At a concentration of 100 ng, IL-6 significantly promotes the invasion of HepG2 cells. (B) The calculated number of invading cells. Data were expressed by mean  $\pm$  SEM from triplicates. \* $P < 0.05$ , compared to serum free medium treated control cells.
